# Supplementary material for: Nitroglycerin use and adverse clinical outcomes in elderly patients with acute coronary syndrome
Source: HighWire-hosted journal article supplement (doi:10.1136/openhrt-2023-002494), 2024-01-01
Supplement: openhrt-2023-002494supp001_data_supplement.pdf [file openhrt-2023-002494supp001_data_supplement.pdf]

1 **Supplementary Files** for the article entitled “**Nitroglycerin use and adverse clinical**  
2 **outcomes in elderly patients with acute coronary syndrome**” by **Komaki et al.**  
3

4 **TABLE OF CONTENTS**

5 **Supplementary Methods S1:** Design and study population - geographic characteristics of  
6 hospital location..... **p 2**

7 **Supplementary Methods S2:** Definitions of coronary risk factors..... **p 2**

8 **Supplementary Methods S3:** PCI procedures.....**p 3**

9 **Supplementary Table S1:** Demographics in patients with ACS with/without GTN use.... **p 8**

10 **Supplementary Table S2:** Characteristics of ACS and PCI procedures in the GTN and non-  
11 GTN groups.....**p 9**

12 **Supplementary Table S3:** Baseline characteristics of the GTN group with and without the  
13 incidence of MACE ..... **p 11**

14 **Supplementary Table S4:** Demographics in elderly and non-elderly patients with ACS  
15 with/without GTN use..... **p 13**  
16

17 **Supplementary Methods**

18 **S1: Design and study population - geographic characteristics of hospital location**

19 Miyazaki Prefectural Nobeoka Hospital is the only regional hospital that plays a central role  
20 in acute intensive care and is the only facility in Nobeoka City with a cardiac catheterization  
21 laboratory where percutaneous coronary intervention can be performed (1,2). The nearest  
22 facility with a catheter laboratory is approximately 60 km from our hospital in another  
23 prefecture. The second nearest facility with a catheter laboratory is approximately 90 km  
24 from our hospital in another city in Miyazaki prefecture. Therefore, it is highly unlikely that  
25 patients with acute coronary syndrome (ACS) in Nobeoka City were transported by  
26 ambulance to facilities other than ours. These features of our hospital allowed us to calculate  
27 the accurate clinical outcomes of patients hospitalized for ACS in Nobeoka City.

28 **S2: Definitions of coronary risk factors**

29 In accordance with the Japanese Society of Hypertension 2009 Guidelines, hypertension was  
30 defined as a systolic blood pressure of 140 mmHg or more, a diastolic blood pressure of 90  
31 mmHg or more, or receiving pharmacological treatment (3). Moreover, in accordance with  
32 the Japanese Atherosclerosis Society 2012 Guidelines, dyslipidemia was defined as when  
33 total cholesterol was 220 mg/dL or more, low-density lipoprotein cholesterol was 140 mg/dL  
34 or more, high-density lipoprotein cholesterol was less than 40 mg/dL, triglycerides were 150  
35 mg/dL or more, or patients were receiving pharmacological treatment (4). Diabetes mellitus

36 was defined when the fasting plasma glucose level was 126 mg/dL or more, the casual  
37 plasma glucose level was 200 mg/dL or more, the HbA1c was 6.5% or more, the 2-hour  
38 plasma glucose level after 75 g glucose loading was 200 mg/dL or more, or the patient was  
39 receiving oral hypoglycemic agents and insulin.

### 40 **S3: PCI procedures**

41 All patients received aspirin, a P2Y12 inhibitor (clopidogrel or prasugrel), and weight-  
42 adjusted intravenous heparin before primary percutaneous coronary intervention (PCI) (5-9).  
43 Patients had a bolus injection of intravenous unfractionated heparin at a dose of 70 to 100  
44 units/kg and maintenance of activated coagulation time at 250 seconds or longer. Invasive  
45 coronary angiography was performed with standard techniques. At least two different views  
46 were obtained for each main vessel. The extent of stenosis of each lesion was evaluated and  
47 recorded based on the visual assessment. The interventional cardiologist judged the indication  
48 of revascularization for culprit lesions. In primary PCI, the efficacy of revascularization of  
49 the culprit artery was comprehensively evaluated for improvement in angiographic findings,  
50 symptom relief, hemodynamic and electrical stabilization, and resolution of ST-segment  
51 elevation by electrocardiogram (ECG). Door-to-balloon time was measured as an index of  
52 early reperfusion in primary PCI for acute coronary syndrome (ACS) and aimed for a door-  
53 to-balloon time shorter than 90 minutes in accordance with the guideline (10). Successful  
54 reperfusion was defined as an acquisition of TIMI 3 flow after PCI.

55 All patients with ACS after PCI were immediately and comprehensively treated in the  
56 coronary care unit while monitoring their ECG and vital signs. Cardiac rehabilitation was  
57 performed at an individually appropriate timing in reference to peak creatinine kinase level or  
58 the presence/absence of complications after ACS in the coronary care unit (11).

59 **References**

- 60 1. Marume K, Nagatomo K, Yamamoto N, et al. Prognostic impact of the presence of on-duty  
61 cardiologist on patients with acute myocardial infarction admitted during off-hours. *J Cardiol*  
62 2020;76:184-90.
- 63 2. Ogata S, Marume K, Nakai M, et al. Incidence rate of acute coronary syndrome including  
64 acute myocardial infarction, unstable angina, and sudden cardiac death in Nobeoka City for  
65 the Super-Aged Society of Japan. *Circ J* 2021;85:1722-30.
- 66 3. Ogihara T, Kikuchi K, Matsuoka H, et al. The Japanese Society of Hypertension  
67 Guidelines for the Management of Hypertension (JSH 2009). *Hypertens Res* 2009;32:3-107.  
68 Erratum in: *Hypertens Res* 2014;37:599. Erratum in: *Hypertens Res* 2009;32:318.
- 69 4. Teramoto T, Sasaki J, Ishibashi S, et al. Executive summary of the Japan Atherosclerosis  
70 Society (JAS) guidelines for the diagnosis and prevention of atherosclerotic cardiovascular  
71 diseases in Japan -2012 version. *J Atheroscler Thromb* 2013;20:517-23.
- 72 5. Jolly SS, Pogue J, Haladyn K, et al. Effects of aspirin dose on ischaemic events and  
73 bleeding after percutaneous coronary intervention: insights from the PCI-CURE study. *Eur*  
74 *Heart J* 2009;30:900-7.
- 75 6. CURRENT-OASIS 7 Investigators, Mehta SR, Bassand JP, et al. Dose comparisons of  
76 clopidogrel and aspirin in acute coronary syndromes. *N Engl J Med* 2010;363:930-42.
- 77 7. Sabatine MS, Cannon CP, Gibson CM, et al. Effect of clopidogrel pretreatment before

- 78 percutaneous coronary intervention in patients with ST-elevation myocardial infarction  
79 treated with fibrinolytics: the PCI-CLARITY study. *JAMA* 2005;294:1224-32.
- 80 8. Ozaki Y, Hara H, Onuma Y, et al. CVIT expert consensus document on primary  
81 percutaneous coronary intervention (PCI) for acute myocardial infarction (AMI) update 2022.  
82 *Cardiovasc Interv Ther* 2022;37:1-34.
- 83 9. TIMI Study Group. The Thrombolysis in Myocardial Infarction (TIMI) trial. Phase I  
84 findings. *N Engl J Med* 1985;312:932-6.
- 85 10. Kimura K, Kimura T, Ishihara M, et al. JCS 2018 guideline on diagnosis and treatment of  
86 acute coronary syndrome. *Circ J* 2019;83:1085-196.
- 87 11. Thomas RJ, Denna T. The role of cardiac rehabilitation following acute coronary  
88 syndromes. *Curr Cardiol Rep* 2014;16:534.
- 89

90

**Table S1: Demographics in patients with ACS with and without GTN use**

|                                     | Total<br>(n = 947)  | GTN group<br>(n = 289) | Non-GTN group<br>(n = 658) | p-value      |
|-------------------------------------|---------------------|------------------------|----------------------------|--------------|
| Height (cm)                         | 161.8 (154.0-168.0) | 162.0(156.0-168.0)     | 161.2 (153.0-168.0)        | 0.334        |
| Body weight (kg)                    | 60.7 (52.9-69.5)    | 62.0 (54.0-70.2)       | 60.3 (52.0-68.5)           | 0.052        |
| BMI (kg/m <sup>2</sup> )            | 23.4 (21.4-26.0)    | 23.7 (21.4-26.3)       | 23.4 (21.4-25.8)           | 0.114        |
| Past history                        |                     |                        |                            |              |
| PCI, n (%)                          | 140 (14.7)          | 52 (17.9)              | 88 (13.3)                  | 0.065        |
| CABG, n (%)                         | 6 (0.6)             | 3 (1.0)                | 3 (0.4)                    | 0.298        |
| MI, n (%)                           | 93 (9.8)            | 34 (11.7)              | 59 (8.9)                   | 0.183        |
| Stroke, n (%)                       | 87 (9.1)            | 29 (10.0)              | 58 (8.8)                   | 0.549        |
| Antihypertensive therapy before ACS | 501 (52.9)          | 151 (52.2)             | 350 (53.1)                 | 0.789        |
| Calcium channel blocker, n (%)      | 381 (40.2)          | 117 (40.4)             | 264 (40.1)                 | 0.916        |
| ACEi/ARB, n (%)                     | 298 (31.4)          | 84 (29.0)              | 214 (32.5)                 | 0.291        |
| β blocker, n (%)                    | 61 (6.4)            | 18 (6.2)               | 43 (6.2)                   | 0.860        |
| diuretic, n (%)                     | 52 (5.4)            | 18 (6.2)               | 34 (4.9)                   | 0.509        |
| Antithrombotic drug use before ACS  |                     |                        |                            |              |
| Aspirin, n (%)                      | 147 (15.5)          | 60 (20.7)              | 87 (12.7)                  | <b>0.003</b> |
| Clopidogrel, n (%)                  | 27 (2.8)            | 5 (1.7)                | 22 (3.2)                   | 0.170        |
| Prasugrel, n (%)                    | 2 (0.2)             | 1 (0.3)                | 1 (0.1)                    | 0.549        |
| Warfarin, n (%)                     | 11 (1.1)            | 7 (2.4)                | 4 (0.5)                    | <b>0.016</b> |
| Direct oral anticoagulants, n (%)   | 13 (1.3)            | 7 (2.4)                | 6 (0.8)                    | 0.066        |

91 Data are presented as medians (interquartile ranges) or numbers (percentages).

92 ACEi, angiotensin-converting enzyme inhibitor; ACS, acute coronary syndrome; ARB,  
93 angiotensin II receptor blocker; BMI, body mass index; CABG, coronary artery bypass graft;

94 GTN, nitroglycerin; MI, myocardial infarction; PCI, percutaneous coronary intervention.

95

96

**Table S2: Characteristics of ACS and PCI procedures**

97

**in the GTN and non-GTN groups**

|                                               | Total<br>(n = 947)       | GTN group<br>(n = 289)   | Non-GTN group<br>(n = 658) | p-value      |
|-----------------------------------------------|--------------------------|--------------------------|----------------------------|--------------|
| PCI approach vessel, n (%)                    |                          |                          |                            |              |
| Radial artery                                 | 796 (84.0)               | 251 (86.8)               | 545 (82.8)                 | 0.348        |
| Brachial artery                               | 86 (9.0)                 | 23 (7.9)                 | 63 (9.5)                   |              |
| Femoral artery                                | 65 (6.8)                 | 15 (5.1)                 | 50 (7.5)                   |              |
| PCI lesion, n (%)                             |                          |                          |                            |              |
| LMT                                           | 36 (3.8)                 | 10 (3.4)                 | 26 (3.9)                   | 0.108        |
| LAD                                           | 403 (42.5)               | 126 (43.5)               | 277 (42.0)                 |              |
| LCX                                           | 137 (14.4)               | 54 (18.6)                | 83 (12.6)                  |              |
| RCA                                           | 370 (39.0)               | 98 (33.9)                | 272 (41.3)                 |              |
| SVG                                           | 1 (0.1)                  | 1 (0.3)                  | 0 (0.0)                    |              |
| Culprit lesion RCA, n (%)                     | 370 (39.0)               | 98 (33.9)                | 272 (41.3)                 | <b>0.031</b> |
| Multivessel coronary artery disease, n (%)    | 388 (40.9)               | 122 (42.2)               | 266 (40.4)                 | 0.606        |
| Killip Classification, n (%)                  |                          |                          |                            |              |
| 1                                             | 594 (62.7)               | 183 (63.3)               | 411 (62.4)                 | 0.927        |
| 2                                             | 164 (17.3)               | 45 (15.5)                | 119 (18.0)                 |              |
| 3                                             | 60 (6.3)                 | 22 (7.6)                 | 38 (5.7)                   |              |
| 4                                             | 129 (13.6)               | 39 (13.4)                | 90 (13.6)                  |              |
| PCI procedure, n (%)                          |                          |                          |                            |              |
| Drug-eluting stents                           | 805 (85.0)               | 239 (82.6)               | 566 (86.0)                 | 0.241        |
| Bare metal stents                             | 74 (7.8)                 | 22 (7.6)                 | 52 (7.9)                   |              |
| POBA, only                                    | 53 (5.5)                 | 21 (7.2)                 | 32 (4.8)                   |              |
| Aspiration, only                              | 15 (1.5)                 | 7 (2.4)                  | 8 (1.2)                    |              |
| Peak CK level, (units/L)                      | 1762.0<br>(724.7-3458.5) | 1740.0<br>(736.5-3512.0) | 1824.0<br>(713.0-3459.0)   | 0.920        |
| Door-to-balloon time, (min)                   | 73.0 (58.0-102.0)        | 73.0 (58.0-95.0)         | 73.0 (58.0-106.0)          | 0.245        |
| Use of imaging device, n (%)                  | 934 (98.6)               | 283 (97.9)               | 651 (98.9)                 | 0.218        |
| Cardiac and respiratory assist devices, n (%) | 164 (17.3)               | 41 (14.1)                | 123 (18.6)                 | 0.092        |
| IABP, n (%)                                   | 95 (10.0)                | 31 (10.7)                | 64 (9.7)                   | 0.637        |
| ECMO, n (%)                                   | 26 (2.7)                 | 7 (2.4)                  | 19 (2.8)                   | 0.687        |
| Temporary pacing, n (%)                       | 87 (9.1)                 | 17 (5.8)                 | 70 (10.6)                  | <b>0.020</b> |
| NPPV or ventilator, n (%)                     | 80 (8.4)                 | 18 (6.2)                 | 62 (9.4)                   | 0.104        |
| PCI Failure, n (%)                            | 5 (0.5)                  | 1 (0.3)                  | 4 (0.6)                    | 0.609        |
| Antithrombotic medication at discharge        |                          |                          |                            |              |
| Aspirin, n (%)                                | 937 (98.9)               | 284 (98.2)               | 653 (99.2)                 | 0.179        |
| Clopidogrel, n (%)                            | 369 (38.9)               | 106 (36.6)               | 263 (39.9)                 | 0.428        |
| Prasugrel, n (%)                              | 565 (59.6)               | 176 (60.8)               | 389 (59.1)                 | 0.563        |
| Warfarin, n (%)                               | 22 (2.3)                 | 10 (3.4)                 | 12 (1.8)                   | 0.283        |
| Direct oral anticoagulants, n (%)             | 59 (6.2)                 | 23 (7.9)                 | 36 (5.4)                   | 0.145        |

98 Data are presented as medians (interquartile ranges) or numbers (percentages).



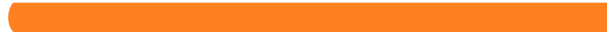

99 CK, creatine kinase; ECMO, extracorporeal membrane oxygenation; GTN, nitroglycerin; IABP,  
100 intra-aortic balloon pumping; LAD, left anterior descending artery; LCX, left circumflex  
101 artery; LMT, left main coronary trunk; NPPV, non-invasive positive airway pressure  
102 ventilation; PCI, percutaneous coronary intervention; POBA, percutaneous old balloon  
103 angioplasty; RCA, right coronary artery; STEMI, ST-elevation myocardial infarction; SVG,  
104 saphenous vein graft.  
105

106

**Table S3: Baseline characteristics of the GTN group**

107

**with and without the incidence of MACE**

|                                            | GTN group with MACE<br>(n = 56) | GTN group without MACE<br>(n = 233) | p-value        |
|--------------------------------------------|---------------------------------|-------------------------------------|----------------|
| Age (years)                                | 77.0 (68.2-86.0)                | 68.0 (60.0-78.0)                    | < <b>0.001</b> |
| Elderly ( $\geq 75$ years), n (%)          | 33 (58.9)                       | 79 (33.9)                           | < <b>0.001</b> |
| Male, n (%)                                | 38 (67.8)                       | 177 (75.9)                          | 0.212          |
| Height (cm)                                | 159.0 (153.5-165.0)             | 163.0 (156.9-168.0)                 | <b>0.030</b>   |
| Body weight (kg)                           | 56.6 (49.2-68.0)                | 62.6 (55.3-71.0)                    | <b>0.015</b>   |
| BMI (kg/m <sup>2</sup> )                   | 23.0 (21.2-25.8)                | 23.9 (21.4-26.4)                    | 0.240          |
| Waist circumference (cm)                   | 90.0 (82.0-97.0)                | 87.5 (82.0-94.0)                    | 0.446          |
| Systolic blood pressure (mmHg)             | 130.0 (95.0-141.0)              | 132.0 (113.0-146.0)                 | <b>0.011</b>   |
| Diastolic blood pressure (mmHg)            | 76.5 (57.7-91.2)                | 84.0 (70.0-95.0)                    | <b>0.011</b>   |
| Previous/current smoking, n (%)            | 22 (39.2)                       | 117 (50.2)                          | 0.142          |
| Hypertension, n (%)                        | 47 (83.9)                       | 192 (82.4)                          | 0.786          |
| Dyslipidemia, n (%)                        | 40 (71.4)                       | 182 (78.1)                          | 0.287          |
| Diabetes mellitus, n (%)                   | 25 (44.6)                       | 75 (32.1)                           | 0.079          |
| Metabolic syndrome, n (%)                  | 13 (23.2)                       | 99 (42.4)                           | <b>0.005</b>   |
| Hemodialysis, n (%)                        | 4 (7.1)                         | 6 (2.5)                             | 0.093          |
| TG (mg/L)                                  | 93.0 (72.5-132.0)               | 107.0 (72.0-154.0)                  | 0.429          |
| HDL-C (mg/L)                               | 42.5 (38.2-52.7)                | 50.0 (42.5-59.0)                    | <b>0.001</b>   |
| LDL-C (mg/L)                               | 110.0 (87.0-140.2)              | 124.0 (99.5-155.0)                  | <b>0.034</b>   |
| HbA1c (%)                                  | 6.30 (5.60-7.55)                | 5.90 (5.60-6.50)                    | 0.068          |
| eGFR (mL/min per 1.73 m <sup>2</sup> )     | 45.6 (29.4-63.5)                | 63.8 (52.2-75.2)                    | < <b>0.001</b> |
| LVEF (%)                                   | 45.8 (35.5-52.7)                | 58.0 (53.0-62.8)                    | < <b>0.001</b> |
| Past history                               |                                 |                                     |                |
| PCI, n (%)                                 | 13 (23.2)                       | 39 (16.7)                           | 0.257          |
| CABG, n (%)                                | 1 (1.7)                         | 2 (0.8)                             | 0.539          |
| MI, n (%)                                  | 13 (23.2)                       | 21 (9.0)                            | <b>0.003</b>   |
| Stroke, n (%)                              | 10 (17.8)                       | 19 (8.1)                            | <b>0.030</b>   |
| Antihypertensive therapy before ACS, n (%) | 27 (48.2)                       | 124 (53.2)                          | 0.501          |
| Calcium channel blocker, n (%)             | 20 (35.7)                       | 97 (41.6)                           | 0.418          |
| ACEi/ARB, n (%)                            | 13 (23.2)                       | 71 (30.4)                           | 0.283          |
| $\beta$ blocker, n (%)                     | 7 (12.5)                        | 11 (4.7)                            | <b>0.031</b>   |
| Diuretic, n (%)                            | 7 (12.5)                        | 11 (4.7)                            | <b>0.031</b>   |
| Antithrombotic drug use before ACS         |                                 |                                     |                |
| Aspirin, n (%)                             | 14 (25.0)                       | 46 (19.7)                           | 0.384          |
| Clopidogrel, n (%)                         | 0 (0)                           | 5 (2.1)                             | 0.269          |
| Prasugrel, n (%)                           | 0 (0)                           | 1 (0.4)                             | 0.623          |
| Warfarin, n (%)                            | 1 (1.7)                         | 6 (2.5)                             | 0.730          |
| Direct oral anticoagulants, n (%)          | 3 (5.3)                         | 4 (1.7)                             | 0.112          |

|              |           |            |       |
|--------------|-----------|------------|-------|
| STEMI, n (%) | 45 (80.3) | 181 (77.6) | 0.663 |
|--------------|-----------|------------|-------|

108 Data are presented as medians (interquartile ranges) or numbers (percentages).

109 ACEi, angiotensin-converting enzyme inhibitor; ACS, acute coronary syndrome; ARB,  
110 angiotensin II receptor blocker; BMI, body mass index; CABG, coronary artery bypass graft;  
111 eGFR, estimated glomerular filtration rate; GTN, nitroglycerin; HDL-C, high-density  
112 lipoprotein cholesterol; LDL-C, low-density lipoprotein cholesterol; LVEF, left-ventricular  
113 ejection fraction; MACE, major adverse cardiovascular events; MI, myocardial infarction; PCI,  
114 percutaneous coronary intervention; STEMI, ST-elevation myocardial infarction; TG,  
115 triglyceride.

116

117

**Table S4: Baseline characteristics in elderly and non-elderly patients with ACS**

118

**with/without GTN use**

|                                            | Elderly ( $\geq 75$ years)<br>(n = 378) |                            |              | Non-elderly (< 75 years)<br>(n = 569) |                            |                  |
|--------------------------------------------|-----------------------------------------|----------------------------|--------------|---------------------------------------|----------------------------|------------------|
|                                            | GTN group<br>(n = 112)                  | Non-GTN group<br>(n = 266) | p-value      | GTN group<br>(n = 177)                | Non-GTN group<br>(n = 392) | p-value          |
| Age (years)                                | 82.0 (78.2-86.0)                        | 82.0 (78.0-86.0)           | 0.951        | 64.0 (56.0-69.0)                      | 64.0 (57.2-70.0)           | 0.296            |
| Male, n (%)                                | 64 (57.1)                               | 136 (51.1)                 | 0.285        | 151 (85.3)                            | 327 (83.4)                 | 0.569            |
| Height (cm)                                | 155.0 (146.8-162.0)                     | 154.0 (146.8-161.1)        | 0.871        | 165.5 (160.0-170.0)                   | 165.0 (159.7-169.0)        | 0.303            |
| Body weight (kg)                           | 55.0 (46.1-61.3)                        | 54.0 (45.9-60.9)           | 0.464        | 66.3 (59.0-74.3)                      | 64.6 (57.6-72.7)           | 0.096            |
| BMI (kg/m <sup>2</sup> )                   | 22.4 (20.3-26.0)                        | 22.8 (20.2-24.8)           | 0.715        | 24.5 (22.3-26.4)                      | 23.8 (21.8-26.2)           | 0.135            |
| Waist circumference (cm)                   | 84.7 (78.6-91.0)                        | 85.0 (80.0-93.0)           | 0.632        | 89.5 (83.0-96.0)                      | 87.5 (82.0-93.0)           | <b>0.034</b>     |
| Systolic blood pressure (mmHg)             | 132.0 (100.0-143.0)                     | 134.0 (113.7-157.0)        | <b>0.007</b> | 132.0 (119.0-144.0)                   | 133.0 (112.0-157.0)        | 0.511            |
| Diastolic blood pressure (mmHg)            | 74.0 (64.0-87.0)                        | 75.0 (64.0-86.2)           | 0.868        | 84.0 (69.0-97.0)                      | 87.0 (73.0-98.0)           | 0.380            |
| Previous/current smoking, n (%)            | 28 (25.0)                               | 74 (27.8)                  | 0.573        | 111 (62.7)                            | 252 (64.2)                 | 0.718            |
| Hypertension, n (%)                        | 96 (85.7)                               | 210 (78.9)                 | 0.126        | 143 (80.7)                            | 268 (68.3)                 | <b>0.002</b>     |
| Dyslipidemia, n (%)                        | 86 (76.7)                               | 160 (60.1)                 | <b>0.002</b> | 136 (76.8)                            | 275 (70.1)                 | 0.099            |
| Diabetes mellitus, n (%)                   | 29 (25.8)                               | 69 (25.9)                  | 0.992        | 71 (40.1)                             | 131 (33.4)                 | 0.122            |
| Metabolic syndrome, n (%)                  | 24 (21.4)                               | 61 (22.9)                  | 0.802        | 88 (49.7)                             | 157 (40.0)                 | 0.070            |
| Hemodialysis, n (%)                        | 2 (1.7)                                 | 6 (2.2)                    | 0.772        | 8 (4.5)                               | 13 (3.3)                   | 0.481            |
| TG (mg/L)                                  | 89.0 (69.0-128.0)                       | 84.0 (62.0-123.5)          | 0.220        | 117.0 (84.0-169.7)                    | 126.0 (85.0-207.0)         | 0.053            |
| HDL-C (mg/L)                               | 49.0 (41.2-62.5)                        | 49.0 (41.0-60.7)           | 0.643        | 48.0 (41.0-58.0)                      | 47.0 (39.0-55.5)           | 0.190            |
| LDL-C (mg/L)                               | 117.5 (94.2-141.0)                      | 112.0 (89.0-140.0)         | 0.389        | 127.0 (99.0-160.0)                    | 129.0 (102.0-159.0)        | 0.892            |
| HbA1c (%)                                  | 5.80 (5.50-6.40)                        | 5.80 (5.40-6.20)           | 0.514        | 6.00 (5.63-7.07)                      | 5.90 (5.53-6.78)           | 0.109            |
| eGFR (mL/min per 1.73 m <sup>2</sup> )     | 52.0 (36.2-63.6)                        | 52.7 (40.2-64.4)           | 0.224        | 66.7 (55.0-81.0)                      | 65.0 (54.0-77.6)           | 0.231            |
| LVEF (%)                                   | 54.5 (45.8-61.4)                        | 55.7 (47.4-61.5)           | 0.579        | 57.4 (51.7-62.6)                      | 57.4 (50.0-62.7)           | 0.661            |
| Past history                               |                                         |                            |              |                                       |                            |                  |
| PCI, n (%)                                 | 21 (18.7)                               | 39 (14.6)                  | 0.321        | 31 (17.5)                             | 49 (12.5)                  | 0.111            |
| CABG, n (%)                                | 2 (1.7)                                 | 2 (0.7)                    | 0.370        | 1 (0.5)                               | 1 (0.2)                    | 0.563            |
| MI, n (%)                                  | 15 (13.3)                               | 26 (9.7)                   | 0.302        | 19 (10.7)                             | 33 (8.4)                   | 0.375            |
| Stroke, n (%)                              | 18 (16.0)                               | 36 (13.5)                  | 0.520        | 11 (6.2)                              | 22 (5.6)                   | 0.776            |
| Antihypertensive therapy before ACS, n (%) | 71 (63.3)                               | 182 (68.4)                 | 0.343        | 80 (45.1)                             | 168 (42.8)                 | 0.602            |
| Calcium channel blocker, n (%)             | 55 (49.1)                               | 137 (51.5)                 | 0.670        | 62 (35.0)                             | 127 (32.3)                 | 0.537            |
| ACEi/ARB, n (%)                            | 36 (32.1)                               | 107 (40.2)                 | 0.139        | 48 (27.1)                             | 107 (27.2)                 | 0.965            |
| $\beta$ blocker, n (%)                     | 8 (7.1)                                 | 20 (7.5)                   | 0.899        | 10 (5.6)                              | 23 (5.8)                   | 0.918            |
| Diuretic, n (%)                            | 12 (10.7)                               | 19 (7.1)                   | 0.248        | 6 (3.3)                               | 15 (3.8)                   | 0.798            |
| Antithrombotic drug use before ACS         |                                         |                            |              |                                       |                            |                  |
| Aspirin, n (%)                             | 28 (25.0)                               | 44 (16.5)                  | 0.056        | 32 (18.0)                             | 43 (10.9)                  | <b>0.020</b>     |
| Clopidogrel, n (%)                         | 3 (2.6)                                 | 9 (3.3)                    | 0.721        | 2 (1.1)                               | 13 (3.3)                   | 0.132            |
| Prasugrel, n (%)                           | 0 (0)                                   | 1 (0.3)                    | 0.516        | 1 (0.5)                               | 0 (0)                      | 0.136            |
| Warfarin, n (%)                            | 2 (1.7)                                 | 4 (1.5)                    | 0.841        | 5 (2.8)                               | 0 (0)                      | <b>&lt;0.001</b> |
| Direct oral anticoagulants, n (%)          | 5 (4.4)                                 | 5 (1.8)                    | 0.153        | 2 (1.1)                               | 1 (0.2)                    | 0.182            |

|              |           |            |       |            |            |       |
|--------------|-----------|------------|-------|------------|------------|-------|
| STEMI, n (%) | 88 (78.5) | 206 (77.4) | 0.810 | 138 (77.9) | 316 (80.6) | 0.467 |
|--------------|-----------|------------|-------|------------|------------|-------|

119 Data are presented as medians (interquartile ranges) or numbers (percentages).

120 ACEi, angiotensin-converting enzyme inhibitor; ACS, acute coronary syndrome; ARB,  
121 angiotensin II receptor blocker; BMI, body mass index; CABG, coronary artery bypass graft;  
122 eGFR, estimated glomerular filtration rate; GTN, nitroglycerin; HDL-C, high-density  
123 lipoprotein cholesterol; LDL-C, low-density lipoprotein cholesterol; LVEF, left-ventricular  
124 ejection fraction; MACE, main adverse cardiac events; MI, myocardial infarction; PCI,  
125 percutaneous coronary intervention; STEMI, ST-elevation myocardial infarction; TG,  
126 triglyceride.
